# Supplementary material for: Sars-CoV-2 Envelope and Membrane Proteins: Structural Differences Linked to Virus Characteristics?
Source: Biomed Res Int. 2020 May 30;2020:4389089. doi: 10.1155/2020/4389089 (PMC7261327; doi:10.1155/2020/4389089)
Supplement: Supplementary Materials — The supplementary data consist of an Excel file containing the list of the 797 Sars-CoV-2 genomes retrieved from GenBank and analysed in the article. For each genome, the sequence header is displayed as found in the GenBank. The header reports the accession code in the first field of each line after the “>” character. [file 4389089.f1.zip]

Archive with 2 entries (2 files):
- Supplementary_description.pdf
- SupplementaryTable1.xlsx
